# Supplementary material for: Intelligent Petroleum Processing: A Short Review on Applying AI/ML to Petroleum Products Optimization
Source: Preprints.org preprint supplement (doi:10.20944/preprints202404.0442.v1), 2024-04-05
Supplement: Supplementary file 1 [file supplementary]

**Intelligent Petroleum Processing: A Short Review on Applying AI/ML to Petroleum Products Optimization**

**Highlights**

- ML can predict natural gas characteristic, enhancing operational safety.
- ML yields deeper insights, surpassing traditional methods in data analysis.
- The accuracy of property predictions for fuels produced in refineries is improved by combining ML with spectral analysis.
- PLS, regression, PCA establish correlations for petroleum products attribute prediction.
- AI/ML revolutionize petroleum industry, improving efficiency and environmental compliance.
